# Supplementary material
Source: Springer Nature journal article supplement (https://www.springermedizin.de/resource/supplementary/13069_2011_107_MOESM8_ESM.pdf/9659770)

**TGF- $\beta$ 1**

-

24h

48h

SRproteins

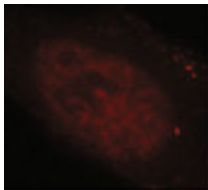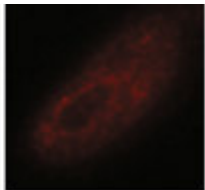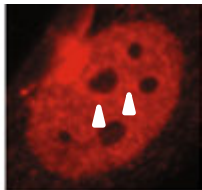

DAPI

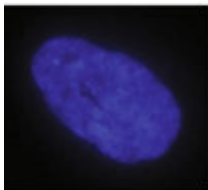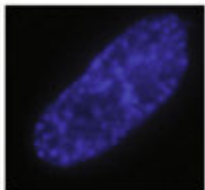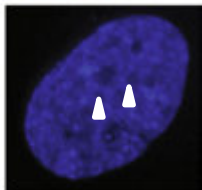

merge

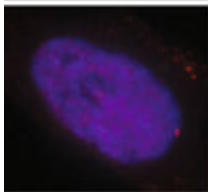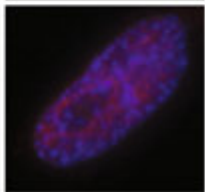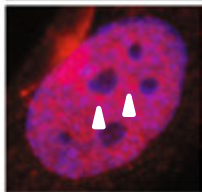

Supplement: MOESM8 [file 9659770]
